## Pervasive Antagonistic Interactions Among Hybrid Incompatibility Loci

Rafael F. Guerrero<sup>1</sup>, Christopher D. Muir<sup>2</sup>, Sarah Josway<sup>3</sup>, and Leonie C. Moyle<sup>1,4</sup>

1. Department of Biology, Indiana University, Bloomington IN U.S.A. 47405
2. Biodiversity Research Centre, University of British Columbia, Vancouver BC, Canada.
3. Oregon Health and Sciences University, Portland Oregon.
4. Corresponding author: [lmoyle@indiana.edu](mailto:lmoyle@indiana.edu)

Running Head: Antagonistic epistasis among hybrid incompatibility loci

## ABSTRACT

Species barriers, expressed as hybrid inviability and sterility, are often due to epistatic interactions between divergent loci from two lineages. Theoretical models indicate that the strength, direction, and complexity of these genetic interactions can strongly affect the expression of interspecific reproductive isolation and the rates at which new species evolve. Nonetheless, empirical analyses have not quantified the frequency with which loci are involved in interactions affecting hybrid fitness, and whether these loci predominantly interact synergistically or antagonistically, or preferentially involve loci that have strong individual effects on hybrid fitness. We systematically examined the prevalence of interactions between pairs of short chromosomal regions from one species (*Solanum habrochaites*) co-introgressed into a heterospecific genetic background (*Solanum lycopersicum*). We used lines containing pairwise combinations of 15 chromosomal segments from *S. habrochaites* crossed into the background of *S. lycopersicum* (i.e., 95 double introgression lines). We compared the strength of hybrid incompatibility (either pollen sterility or seed sterility) expressed in each double introgression line to the expected additive effect of its two component single introgressions. We found that: epistasis was common among co-introgressed regions; epistatic effects for hybrid dysfunction were overwhelmingly antagonistic (i.e., double hybrids were less unfit than expected from additive single introgression effects); and, epistasis was substantially more prevalent in pollen fertility compared to seed fertility phenotypes. Together, these results indicate that higher-order interactions frequently contribute to postzygotic sterility barriers in these species. This pervasive epistasis leads to the decoupling of the patterns of accumulation of isolation loci and isolation phenotypes, and is expected to attenuate the rate of accumulation of hybrid infertility among lineages over time (i.e., giving diminishing returns as more reproductive isolation loci accumulate). This decoupling effect might also explain observed differences between pollen and seed fertility in their fit to theoretical predictions of the accumulation of isolation loci, including the ‘snowball’ effect.

30 AUTHOR SUMMARY

A characteristic feature of new species is their inability to produce fertile or viable hybrids with other lineages. This post-zygotic reproductive isolation is caused by dysfunctional interactions between genes that have newly evolved changes in the diverging lineages. Whether these interactions occur between pairs of divergent alleles, or involve more complex networks of genes, can have strong effects on how rapidly reproductive isolation—and therefore new species—evolve. The complexity of these interactions, however, is poorly understood in empirical systems. We examined the fertility of hybrids that carried one or two chromosomal regions from a close relative, finding that hybrids with two of these heterospecific regions were frequently less sterile than would be expected from the joint fitness of hybrids that have the same regions singly. This ‘less-than-additive’ effect on hybrid sterility was widespread (observed in 20% of pairwise combinations), and especially pronounced for male sterility. We infer that genes contributing to male sterility form a more tightly connected network than previously thought, implying that reproductive isolation is evolving by incremental dysfunction of complex interactions rather than by independent pairwise incompatibilities. We use simulations to illustrate these expected patterns of accumulation of reproductive isolation when it involves highly interconnected gene networks.

## 50 INTRODUCTION

Intrinsic postzygotic isolation (hybrid inviability and sterility that occurs independently of the environment) is often due to deleterious genetic interactions between loci that have functionally diverged during the evolution of new species (*i.e.*, Dobzhansky-Muller incompatibilities, or DMIs; [1]). Several models of this process assume that individual DMIs are due to epistasis between one locus in each diverging lineage (*i.e.*, pairwise genetic interactions), and that each DMI contributes independently to the expression of hybrid incompatibility between diverging species (although some models can relax the first assumption; see [2-4]). If hybrid dysfunction is due to more complex interactions among loci, however, there can be important consequences for the temporal accumulation of species barriers and the number of loci required to complete speciation [4-6]. In the simplest case, if epistasis between different hybrid incompatibility loci is antagonistic (*i.e.*, if the combined effect of two different DMIs is less than expected based on their individual effects on hybrid incompatibility), then a greater time to speciation is expected and correspondingly more loci are required. Conversely, if epistasis between different conspecific loci is typically synergistic (*i.e.*, the combined effect on hybrid incompatibility is greater than expected based on individual effects), fewer DMIs will be required for the expression of complete reproductive isolation, with a correspondingly shorter time to speciation. In the latter case, although the initial observation of incompatibility phenotypes requires more than one substitution per lineage, hybrid incompatibility can be expressed rapidly between two diverging species once substitutions have begun to accumulate. The prevalence of epistasis, and whether this epistasis is synergistic or antagonistic, can therefore be critical in determining patterns

and rates of evolution of isolation between diverging lineages by governing the accumulation dynamics of alleles that contribute to species barriers (*e.g.*, [4, 5]; and see  
75 below).

Empirically, however, very little is known about the nature of epistasis among different loci contributing to hybrid incompatibility ('complex epistasis', *c.f.* [7]) and whether these interactions typically act to enhance or retard the expression of hybrid  
80 incompatibility between species. Some evidence suggests that non-additive interactions affecting the fitness of hybrids might be common. In *Drosophila*, for example, quantitative trait loci (QTL) for male sterility show evidence of complex epistasis. Several individual genomic regions are simultaneously required for the expression of some male sterility phenotypes (*e.g.*, [8]; other evidence is reviewed in [1]), consistent  
85 with synergism (*i.e.*, greater-than-additive effects) between conspecific loci for the expression of hybrid sterility. However, epistasis has been difficult to assess in many genetic analyses of quantitative trait loci because early recombinant generations have low power to detect these interactions [9]. The most promising method of directly estimating epistasis among loci is to subtract background effects by isolating two individual QTL in  
90 an otherwise isogenic background (*e.g.*, [10]). For example, this approach revealed less-than-additive effects for quantitative and ecophysiological traits in tomato, consistent with antagonistic interactions between different conspecific loci [11, 12]. Similarly, studies in microorganisms have used serial pairwise combinations of target loci to examine the size and direction of pairwise epistasis on the phenotypic effects of, for  
95 example, double deletion strains in yeast [13], and metabolic flux mutants in yeast and *E.*

*coli* [14]. Nonetheless, the serial combination of many pairs of conspecific loci has yet to be used to assess prevalence and direction of interactions influencing hybrid incompatibility phenotypes [15].

100 The goal of this study was to assess the prevalence and direction of genetic interactions between different chromosomal regions from one species when combined pairwise in the background of a second species (Figure S1), focusing specifically on the consequences of pairwise conspecific epistasis for the expression of hybrid incompatibility. We studied fifteen chromosomal regions (Table 1), drawing from a set of 71 introgression lines (ILs) 105 between two plant species in the genus *Solanum* Section *Lycopersicon* (the tomato clade) [16]. Each IL contains a unique short chromosomal region from the wild species *S. habrochaites* ('*hab*') introgressed into the otherwise isogenic genetic background of the domesticated tomato, *S. lycopersicum* ('*lyc*') ([16]; see [17] for a previous summary). The fifteen ILs included in our study, several of which have effects on either pollen or 110 seed sterility ([17], and see *Results*), were previously chosen and crossed to generate nearly 100 double introgression lines (DILs; [18]). Here, we draw on this collection of DILs to study the effect of interactions among conspecific introgressed regions on the expression of known hybrid incompatibility phenotypes. Specifically, we compared fertility phenotypes in homozygous DILs to those of their corresponding parental ILs to 115 infer frequency, magnitude and direction of epistasis among conspecific introgressions.

We found that complex interactions were common in both pollen and seed fertility phenotypes, although significantly more frequent for introgressions affecting pollen

sterility. These observed interactions were frequently antagonistic, whereby the combined  
120 effect of pairwise introgressions produced a less severe effect on fitness than predicted  
from individual effects. For pollen sterility phenotypes, we found that some chromosomal  
regions were considerably more prone to interaction than others: most interactions  
occurred among introgressions with significant individual effects. In contrast, we found  
no evidence of a similar pattern for seed sterility.

125

This pervasive antagonism has critical implications for the predicted rate and pattern of  
accumulation of hybrid incompatibility between these lineages, and for future empirical  
studies of the evolution of post-zygotic isolation. We found unexpectedly abundant  
interactions among genes underlying the phenotypes studied, which implies a violation of  
130 key assumptions—regarding the independence among different pairs of incompatibility  
loci—made by many speciation models. We propose that this high connectivity among  
loci that contribute to pollen sterility could explain the observed flattened accumulation  
of (pairwise) pollen incompatibilities in this clade [18]. In addition to explaining this  
apparent lack of “snowball” effect, our results also imply that standard QTL mapping  
135 approaches can underestimate the number of incompatibility-causing interactions present  
in systems with high levels of epistasis.

## METHODS

We assessed fertility phenotypes for 110 unique genotypes: the isogenic parental *lyc*, 15  
140 homozygous introgression lines (ILs), and 95 double-introgression lines (DILs), each of  
which were generated previously. Monforte et al. [16] constructed a library of over 70

introgression lines that cover 85% of the *hab* genome in the background of *lyc*. Each line contains a single, marker delimited chromosomal region from *hab* introgressed into the background of *lyc*. Using this IL library, we had detected 8 and 5 QTL for hybrid pollen and seed sterility, respectively, between these species [17]. Based on these results, Moyle & Nakazato [15] chose 15 ILs (covering about 36% of the donor genome) to use in the construction of DILs. Ten of these lines carried QTL for hybrid incompatibility (five with significant pollen, and five with significant seed, sterility effects) when compared to pure parental genotypes. The remaining five lines contain *hab* introgressions with no previously detected phenotypic effect on pollen or seed sterility; these additional lines were chosen based on their distribution in the genome (each was located on a different chromosome), and to be roughly comparable in terms of introgression length (as a percent of *hab* genome introgressed) as the partially sterile lines (Table 1). Nonetheless, because the detection of sterility effects can be sensitive to environmental conditions and dependent on experimental power, all 15 lines were reassessed for sterility effects in the current experiment (see *Results*).

To generate the DILs, Moyle & Nakazato [15] performed a full diallel cross among the 15 ILs to combine each introgression with each other introgression (producing a total of 105 unique pairwise combinations; Figure S1). Heterozygote F<sub>1</sub> DILs from each of these 105 pairwise IL combinations were selfed to generate F<sub>2</sub> seeds, and up to 120 F<sub>2</sub>s in each DIL family were grown and genotyped for two markers, one located in each introgressed region. From these families, individuals that were confirmed to carry two *hab* alleles at both introgression locations (i.e., double *hab* homozygotes) were retained. For the current



165 experiment, these lines were selfed to produce double *hab* homozygous seed. Out of the  
105 DILs, we excluded one with overlapping introgressions and one due to ambiguous  
genotyping. From the remaining 103 lines, seven failed to produce seed from self-  
fertilizations, despite repeated hand-pollinations; these genotypes were necessarily  
excluded from the experiment (see summary of missing data in Table S1). Note that we  
170 focus our analysis here solely on comparisons of fertility between ILs and DILs that are  
homozygous for *hab* introgressions. This is because the offspring of heterozygous NILs  
and DILs are expected to segregate for introgressions, preventing an equivalently direct  
comparison of fertility between these classes of lines. These genotypes and phenotypes  
are therefore not analyzed here.

175

#### Assessment of fertility phenotypes

Each unique genotype was grown and assessed in replicate (total experiment size = 702  
individuals; Table S2) in a fully randomized common garden (greenhouse) experiment at  
the IU Biology greenhouse facility. Cultivation methods have been previously described  
180 [12]. Briefly, all experimental seeds were germinated under artificial lights on moist filter  
paper, transferred to soil post-germination (at the cotyledon stage), and repotted into  
1gallon pots at 4-6 weeks post-germination. A total of 652 individuals reached  
reproductive maturity. Due to mortality and/or fecundity variation among individuals, we  
were able to collect pollen and seed fertility data from 569 and 620 individuals,  
185 respectively (Table S2). Because of these inviability or fertility effects, not all DIL  
genotypes had biological replicates and so were not included in analyses. In total, we

analyzed pollen and seed fertility data for 95 and 93 DILs, respectively (see Table S3, *Results and Discussion*).

190 Seed fertility (seeds per fruit) was determined by quantifying seed production from self-pollinated fruits ('self-seed set'), as with previous QTL analyses [19]. At least two flowers per plant were allowed to produce fruit via selfing; when fruits did not develop automatically, flowers were self-pollinated manually to ensure that floral morphology was not responsible for preventing self-fertilization. Upon maturation, individual fruits  
195 were harvested, seeds extracted by hand, and seed fertility determined by counting the number of visible seeds from each fruit. Average seed per fruit for each plant was used to generate self-seed set estimates for each introgression genotype and the *lyc* control parent.

200 Pollen fertility (quantified as the proportion of fertile pollen) was estimated on two unopened flowers on each plant, as previously described [17]. Briefly, all pollen (the entire anther cone) from each target flower was collected into lactophenol-aniline blue histochemical stain, homogenized, and a known sub-sample of homogenate used to count  
205 inviable and viable pollen grains using microscopy. Pollen inviability was indicated by the absence of a stained cytoplasm, a conservative measure of pollen infertility [20].

Seed set phenotypes may be affected by three components: ovule viability, pollen fertility, and gamete compatibility in the zygote. Therefore, pollen sterility in our lines may influence estimates of seed sterility. In fact, we found a weak but significant

210 correlation between pollen fertility and self-seed set across our experimental lines  
( $P=0.0014$ ; negative-binomial GLM). However, pollen fertility explained only about 5%  
of variation in seed fertility (pseudo- $R^2 = 0.046$ ), which is consistent with previous  
studies [17, 19]. Nonetheless, we removed this small pollen effect by carrying out our  
analyses of self-seed set on their residuals from the regression on pollen fertility  
215 (including the genotype as a random effect in a GLM). For completeness, we carried out  
the same analyses on the uncorrected self-seed set values; our results do not differ  
qualitatively between these analyses (Figure S2) but, as the ‘pollen-corrected’ data is  
more conservative with respect to inferring sterility effects, we report these results here.

## 220 Analysis

### *Estimation of sterility in ILs*

To quantify the individual effect of introgressions on hybrid fitness we tested for  
differences between the phenotypes of the ILs and those of the background parent, *lyc*,  
using generalized linear models (GLMs) with a single fixed effect. Pollen fertility was  
225 tested assuming a quasi-binomial error distribution appropriate for proportion data. Seed  
fertility data were analyzed assuming a normal error distribution (after pollen-correction,  
see above). Fitness of each IL was tested independently against *lyc*, allowing slightly  
different significance thresholds for each fitness component. For corrected self-seed set  
data, we took ‘sterile’ ILs at a false discovery rate (FDR) of 5% (which implied  $P <$   
230  $0.005$ ; Table 1). We were slightly more stringent with significance for pollen fertility, for  
which we took ‘sterile’ ILs at a FDR of 1% (which corresponded to  $P < 10^{-4}$ ). The

significance threshold of individual IL effects on sterility does not affect our key findings (see *Results*, Figure S3).

### 235 *Inference of epistatic effects in DILs*

We used a likelihood maximization framework to infer the presence and strength of epistasis from DIL phenotypic data. In our likelihood approach fitness can be either additive (where fitness effects in DILs are the sum of the fitness effects of the two parental ILs) or multiplicative (in which DIL fitness is the product of parental IL fitness).

240 These common alternative fitness models were included to allow us to evaluate epistatic interactions for each DIL (*i.e.*, to compare non-epistatic --or null-- and epistatic models, as outlined below) without having to assume *a priori* precisely how introgressions combine to affect fitness in each DIL genotype. Given this, we did not test support for choice between additive and multiplicative models of fitness. (Indeed, there was little  
245 evidence for significant differences in the fit of these models; see *Results*.) Instead, we estimated statistical support for the choice between null vs. epistatic models, in line with our primary goal to assess evidence for epistatic interactions.

First, we define fitness in DILs and their IL parents as the phenotype (pollen or seed  
250 fertility) relative to the mean phenotype in *lyc*. For each DIL carrying introgressions  $i$  and  $j$ , we assume that relative fitness,  $w_{ij}$ , is normally distributed with mean and variance,  $\mu_{(\psi)}$  and  $\sigma_{(\psi)}^2$ , determined by the fitness model  $\psi (= \{a, p\})$ , relative fitness of the parental ILs ( $w_i$  and  $w_j$ ) and  $\varepsilon_{ij}$ , the epistasis parameter. Under the additive fitness model,  $\mu_{(a)}$  and  $\sigma_{(a)}^2$ , are the mean and variance of the vector  $\mathbf{v}_{ij}^{(a)} = \mathbf{w}_i + \mathbf{w}_j - 1 + \varepsilon_{ij}$ , where  $\mathbf{w}_i$

255 and  $\mathbf{w}_j$  are vectors holding  $k$  observed values for  $w_i$  and  $w_j$  (that is, there are  $k$  biological replicates of each parental IL). Similarly, under the multiplicative fitness model the parameters  $\mu_{(p)}$  and  $\sigma_{(p)}^2$  are the mean and variance of the vector  $\mathbf{v}^{(p)}_{ij} = (1 + \varepsilon_{ij})(\mathbf{w}_i \cdot \mathbf{w}_j)$ , with the underlying simplification that the product of two normally distributed random variables ( $w_i$  and  $w_j$ ) is approximately normal for parameters  $\mu_{(p)} = O(1)$  and  $\sigma_{(p)}^2 \ll 1$ .

260 The likelihood function for a single DIL under model  $\psi$  is  $L_\psi = \prod_{n=1}^N \mathbb{P}(w_{ij}^n = x | \mu_{(\psi)}, \sigma_{(\psi)}^2)$ , the product of the normal probability density over  $N$  observations of relative fitness. In both models, the likelihood function has the epistasis term,  $\varepsilon_{ij}$ , as a single free parameter.

265 We maximized likelihood for each model numerically (using the *mle* function from the *stats4* package in R; [21]). To improve normality of our observations, we used arcsine transformed values for pollen fertility. Because we have different sample sizes for the phenotypes of parental ILs (*i.e.*, vectors  $\mathbf{w}_i$  and  $\mathbf{w}_j$  have different lengths), we subsampled without replacement each set of observations to the minimum parental pair of each DIL  
270 (that is, took  $k_m = \min(k_i, k_j)$  elements from each vector). We repeated this subsampling 100 times, and took the average of  $\mu_{(\psi)}$  and  $\sigma_{(\psi)}^2$  from all of them to obtain estimates that use all our data and minimize the effect of pairing observations from parental ILs.

To choose the best model, we compared the resulting maxima using the Bayesian  
275 Information Criterion (BIC; [22]). Additionally, to confidently infer cases of epistasis, we required that our best-fit epistasis model have a better BIC score than that of two null models (both additive and multiplicative fitness models with  $\varepsilon_{ij} = 0$ ). Finally, we obtained

statistical support for our inference of epistasis through a likelihood-ratio test of the best-fit epistasis model against the best null model (assuming a chi-squared distribution of the log-likelihood surface and 1 degree of freedom). We applied a correction for multiple testing within each phenotype, taking significant epistatic interactions at a 1% FDR for both pollen and seed sterility. We visualized significant interactions between ILs as a network using the *igraph* [23] and *ggraph* packages [24]. In these networks, each node represents an IL (specifically, the introgressed chromosomal region within that IL), while edges represent an epistatic interaction between two ILs. All scripts used, written in R [21], are available in the Supplement (File S1).

Our approach is similar to the one described by Gao *et al.* [25] for the classification of epistasis. In contrast to that previous work, however, we have not considered a third fitness model (the ‘minimum’ model) in our reported estimations. The ‘minimum’ model aims to assess statistical independence among mutations, however it leads to difficulty detecting certain types of biological interactions (*e.g.*, ‘masking’ and ‘co-equal’ interactions; [26]), and might not be adequate when testing epistasis among loci with known similar functions [25]. Moreover, when our data are re-analyzed including this model, there is no change in the direction and only a slight decline in the frequency of significant epistatic interactions (Table S3).

For simplicity, throughout this manuscript we refer to individual effects of QTL and interaction effects between loci –although strictly discussing the phenotypic consequences of entire introgressions. The estimated length of some of our introgressions

(Table 1) suggests that they could carry up to several hundred genes each. Indeed, we found a weak correlation between the size of an introgression and its total number of interactions (negative binomial GLM,  $P = 0.02$ , pseudo- $R^2=0.07$ ; Figure S4).

Accordingly, our study more accurately is an analysis of the frequency and strength of  
305 *trans* interaction effects between short conspecific chromosomal regions and is unable to differentiate, for example, the single versus combined phenotypic effects of multiple genes within any given introgression. Depending upon genetic structure of these QTL at finer chromosomal scales, the specific genetic interpretation of types and dynamics of substitutions would change. We note, however, that most observations of complex  
310 epistasis outside of microbial studies have come from examining *trans* interactions between chromosomal regions rather than individual genes (*Drosophila*, [27]; *Tigriopus*, [28]; *Mimulus*, [29]). In addition, prior QTL mapping studies in this and other *Solanum* species pairs indicate that the genetic basis of hybrid incompatibility is modestly, not highly, polygenic [17, 19]; therefore, unless individual loci underlying sterility QTL are  
315 unusually (and unexpectedly) highly clustered within the genome, these data suggest most introgressions do not harbor multiple different sterility-causing loci.

## RESULTS

We found three prevalent patterns of conspecific epistasis for hybrid incompatibility.

320 First, epistatic interactions between conspecific loci are common, especially among introgressions with larger individual effects on fertility (Figures 1 and 2). Second, these interactions are predominantly antagonistic (*i.e.*, less-than-additive) in their effects on

hybrid incompatibility phenotypes. Third, both these patterns are significantly more pronounced for pollen than seed sterility effects.

325

For seed sterility, we found evidence of fertility-affecting interactions between introgressions in about one fifth of DILs analyzed (Figure 1). Out of 93 DILs, 16 showed departures from fitness models of independence ( $P < 0.01$ , FDR=5.6%). Interactions were qualitatively more common for pollen fertility phenotypes (Figure 2), where 25 out of 95 analyzed DILs were best fit by epistatic fitness models ( $P < 0.01$ , FDR=3.4%). Remarkably, most of these interactions were antagonistic: in seed phenotypes, 10 DIL hybrids were less sterile than expected by their IL parents' individual effects. This pattern was considerably more dramatic for pollen fertility, where all 25 detected epistatic interactions were antagonistic (Figure 2, Table S3).

335

We found little difference between pollen and seed sterility phenotypes in the magnitude of epistasis or the best fit fitness model (Table S3). Epistatic interactions caused, on average, a 37% excess in pollen fitness when compared to the fitness predicted from the joint effect of parental ILs. In seed sterility, we found similar effect sizes in synergistic and antagonistic interactions (33% and 45%, respectively). In most DILs with significant epistatic effects, an additive fitness model had a better fit than a multiplicative one (10 out of 16 in seed; 21 out of 25 in pollen); this was also true in DILs with no significant epistatic effects for seed (39 out of 77 DILs) but not for pollen phenotypes (16 out of 70). Note, however, that most differences in likelihood values between the two fitness models are probably not significant: only 6 cases (out of 188 analyzed DIL phenotypes) showed

345



likelihood differences that would be significant in a chi-squared test (*i.e.*, greater than 3 log-likelihood units, roughly  $P=0.01$ ). This apparent bias in favor of an additive fitness model could be because this model predicts slightly larger variance than its multiplicative counterpart, resulting in a better fit even when there are no biologically meaningful differences in predicted means.

Epistatic interactions for fitness were common across the genome: most parental ILs were involved in at least one interaction with another conspecific introgression (all except *LA3948* for seed and *LA3931* for pollen fertility; Figures 1 and 2). In pollen phenotypes, however, interactions more frequently involved introgressions that had individual sterility effects. This bias becomes more apparent in highly significant interactions (14 DILs at FDR=1%; bordered panels in Figure 2), which always involved DILs with at least one pollen-sterile IL parent genotype; moreover, 10 of these 14 highly significant interactions involved two sterile ILs.

Individually, each of the observed interactions could be used to infer whether the incompatibility they participate in is pairwise or higher-order (Figure 3). A pairwise DMI could be inferred when an antagonistic interaction is observed between a sterile and a non-sterile IL (found in 4 cases for seed, and 4 for pollen phenotypes), since phenotype rescue in the DIL is consistent with complementation of loci carried by parental ILs. On the other hand, higher-order DMIs could be inferred from two types of interactions. First, all synergistic interactions (2 cases in seed phenotypes) imply introgressions that are part of a third-order (or higher) DMI in which a specific combination of alleles is necessary

for sterility. Second, antagonistic epistasis between sterile ILs (the most common in our  
370 data; 10 cases, all in pollen phenotypes) implies an incompatibility involving at least  
three loci. We can rule out a pairwise DMI, which would not be consistent with the  
expectation that the complementing allele should be compatible with the heterospecific  
background (that is, there should be asymmetry of DMI allelic effects [30]). However, we  
cannot determine how these three or more loci interact: the parental ILs could carry loci  
375 involved in a single higher-order DMI, or the interaction could be the result of complex  
epistasis between two pairwise incompatibilities.

Regardless of these individual inferences, the overall pattern of interactions we detect  
indicates there is a complex landscape of interdependence among sterility loci. This  
380 pattern can be visualized by representing the distribution of interactions as a network  
(Figure 4). In pollen, ILs formed a single interconnected cluster in which each line had,  
on average, 1.9 highly significant interactions. Sterile ILs for pollen had more  
interactions (*i.e.*, a higher node degree; 3.5 on average) than non-sterile introgressions  
(0.5 on average). In contrast, the overall network of interactions in seed phenotypes was  
385 sparser than in pollen phenotypes, with three separate clusters of up to 4 ILs. The seed  
sterility network showed no direct connections between two sterile ILs, and sterile ILs  
had similar number of interactions than non-sterile ILs (0.8 on average for both groups).  
The number of interactions in which an IL was involved is not correlated with its mean  
effect size for seed sterility (unlike for pollen sterility; Figure S3), suggesting that the  
390 lower overall connectivity and reduced enrichment for individually sterile ILs we

observed in seed phenotypes is robust to our arbitrary cut-off for significance of individual IL sterility (FDR of 1% for pollen and 5% for seed).

## DISCUSSION

395 By examining multiple pairwise combinations of conspecific loci, co-introgressed into a heterospecific background, we have shown evidence for pervasive non-independence among introgressions. This non-independence is likely due to a combination of pairwise interactions, higher-order incompatibilities, and complex epistatic effects, and suggests that hybrid phenotypes might frequently be the product of epistatic interactions among  
400 several factors. For pollen sterility phenotypes, we found that some chromosomal regions were more prone to interaction than others: most interactions occurred among introgressions with significant individual effects. In contrast, we found no evidence of a similar pattern for seed sterility. Finally, the observed interactions in pollen phenotypes were overwhelmingly antagonistic, whereby the combined effect of pairwise  
405 introgressions produced a less severe effect on fitness than predicted from individual effects. This observed pervasive antagonism could have important implications for understanding both the predicted patterns and the mechanism of accumulation of hybrid incompatibility between lineages, as well as for the detection of such loci in QTL mapping efforts.

410

Interactions were common in both pollen and seed fertility phenotypes, although considerably more frequent for introgressions affecting pollen sterility. Interactions in seed suggest at least two higher-order incompatibilities, composed of three and four loci

(if we focus on highly significant edges in Figure 4). In the pollen network, ILs form a  
415 single cluster of highly significant interactions, and most of these interacting ILs are  
epistatic with at least two other introgressions (8 out of 10 ILs; Figure 4). Speculating on  
the genetic details underlying these patterns of interdependence is not straightforward.  
One extreme interpretation is that this large module represents a single incompatibility  
that involves ten loci (*i.e.*, a tenth-order DMI). Alternatively, each of these antagonistic  
420 interactions could represent a pairwise hybrid incompatibility, which implies that pollen-  
sterility loci are frequently involved in more than one DMI (since many ILs show more  
than one interaction). This latter interpretation is also consistent with our observation that  
pollen sterile ILs show more interactions than non-sterile ones, since each interaction in  
which they engage could contribute to their observed fitness (*i.e.*, ILs involved in more  
425 DMIs would, on average, show larger fitness effects). While our approach does not allow  
us to distinguish between these alternatives, our observations likely represent a mix of  
higher-order DMIs and loci involved in multiple pairwise incompatibilities. However, the  
involvement of loci in more than one hybrid incompatibility violates a central assumption  
in classical models of their evolutionary accumulation (an issue that we examine below).

430

The differences in connectivity between seed and pollen phenotypes could explain  
previously observed differences in the pattern of accumulation of hybrid incompatibilities  
(or ‘snowball’ effect) in this group. Moyle & Nakazato [18] showed that, while the  
accumulation of seed sterility QTL among increasingly divergent *Solanum* lineages  
435 follows the predicted snowball (*i.e.*, it is faster than linear), this does not seem to be the  
case for QTL involved in pollen fertility. At first, this linear accumulation of pollen

fertility QTLs may seem at odds with our observation of high connectivity for the phenotype, because theory predicts a faster increase in the number of incompatibilities with increasing connectivity among loci. In the simplest version of the snowball model, 440 the number of incompatibilities is roughly proportional to the square of  $K$ —the number of genetic differences between two species, and  $p$ —the probability that any pair of these is incompatible [30]. Therefore, factors that increase  $K$  or  $p$  should increase the speed of the snowball. For instance,  $K$  could be elevated for phenotypes experiencing selective pressures, such as antagonistic coevolution, that result in sustained elevated rates of 445 substitution [31, 32]. Similarly, the probability that any pair of genetic differences is incompatible ( $p$ ) is elevated when there are more opportunities for incompatibilities to arise, such as when the phenotype is controlled by a highly connected network of genes. Given these predictions, our results would suggest that the number of detected pollen sterility loci should snowball faster than seed sterility loci (yet, they do not).

450

A possible explanation for this discordance lies in the assumption that the number of loci involved in incompatibilities represents an adequate proxy for the total number of incompatibilities. Because of the challenges of identifying underlying molecular loci, empirical studies have used the number of sterility QTL as an indicator of the number of 455 DMIs, with the underlying assumption that each QTL is involved in only one (pairwise) incompatibility. Under a pairwise snowball model, each locus is involved in  $(K-1)p$  incompatibilities on average [3]. Since  $p$  (the probability of an incompatible pair) is assumed to be very small compared to  $K$ , such that  $(K-1)p \ll 1$ , each QTL is therefore likely to be involved in just one incompatibility. In cases with increased  $p$ , however,

460 sufficient genetic differences could accumulate that  $(K-1)p \geq 1$  (*i.e.*, loci are, on average,  
involved in one or more incompatibilities). After this “saturation” point, each new genetic  
difference will continue to generate  $(K-1)p$  new incompatible interactions, but the number  
of loci involved in hybrid incompatibility increases just by one. Note that many loci  
could be involved in more than one incompatibility before the system reaches saturation  
465 so that the deceleration of the snowball need not be abrupt [33]. We illustrate the  
phenomenon of saturation by simulation of the accumulation of pairwise  
incompatibilities (Figure 5). These simulations (carried out in R; [21]) simply count the  
number of pairwise incompatibilities between two lineages as substitutions fix, allowing  
each new substitution to be incompatible with any of the existing ones at that time (with  
470 probability  $p$ ). As Figure 5 shows, incompatibilities (*i.e.*, interactions that affect hybrid  
fitness) in saturated systems continue to snowball while the number of individual loci  
contributing to hybrid incompatibility starts to increase linearly, breaking the relationship  
between sterility-affecting loci and DMIs. Our simulations are consistent with recent  
analytical results that also show that, as  $p$  increases, the number of incompatibility loci  
475 tends to underestimate the number of pairwise incompatibilities [33].

Saturation of the gene network for pollen fitness would be consistent with our  
observation that several pollen-sterile ILs showed multiple interactions (which suggests  
they are involved in a higher-order DMI or multiple pairwise ones) and with the  
480 previously observed lack of snowball for this phenotype ([18]. Interpreted under a  
framework of saturation, these two observations suggest many loci underlying pollen  
fertility are already involved in at least one incompatible interaction between species, so

that the accumulation of new interactions does not result in the increase of unique sterility loci at a similar rate. In other words, pollen sterility might be close to saturation for  
485 hybrid incompatibility loci (the nodes in our network; Figure 4), even while the DMIs in which they are involved (the edges in our network; Figure 4) continue to snowball among incompatibility loci. If pollen fertility is indeed saturated, it follows that pollen-affecting DMIs may be accumulating in tomatoes faster than previously thought (*i.e.*, [18]) because the number of incompatibility QTL underestimates the number of DMIs. This inference  
490 is similar to that of recent simulation work on the accumulation of DMIs in an RNA-folding model, which showed that the number of pairwise DMIs will not snowball in systems where these interactions are converted into higher-order DMIs (when new substitutions result in the involvement of a new locus in an existing DMI; [33]).  
Interestingly, this recent theoretical work also showed that the rate of accumulation of  
495 pairwise DMIs slows down as the probability of incompatibility increases [33]. This implies that the high connectivity of the pollen network could be responsible for the observed lack of snowball even if the network is not fully saturated.

Properties of the genome-wide gene network, such as modularity and degree distribution,  
500 could also contribute to our proposed saturation of pollen sterility. For instance, highly modular genomes can allow for high  $p$  within a module (*e.g.*, among the genes controlling pollen fertility) even when there is a low genome-wide mean probability of incompatibility. Previous estimates of genome-wide  $p$  in tomatoes ( $\sim 10^{-9}$ ; [18]) are smaller than those estimated for *Drosophila* ( $10^{-7} - 10^{-8}$ , [3]), and much smaller than  
505 would seem to be required for saturation. However, our inference of saturation in the

pollen network implies large  $p$  among pollen loci only, which need not be reflected in  $p$  genome-wide. A skewed degree distribution could also contribute to an apparent saturation by having highly connected loci involved in multiple DMIs while most loci are not involved in an incompatibility. In other words, pollen sterility could be primarily  
510 controlled by highly connected genes (*i.e.*, be network ‘hubs’), which have a much higher probability of interacting than the genome-wide average. On the other hand, evolutionary processes could have accelerated the rate of divergence specifically at loci involved in fertility traits (that is, have elevated  $K$  at pollen loci only, rather than across the whole genome). For reproductive traits, this coevolution could arise from antagonistic male-  
515 female interactions during reproduction (*e.g.*, [34, 35]).

In contrast to these inferences from our pollen data, our observations imply that seed sterility loci in these species might be more likely to engage in DMIs that involve simple pairwise interactions (rather than higher-order epistasis), and that this phenotype is  
520 further from saturation. That is, each additional seed sterility-causing substitution is more likely to originate a new DMI with a unique interacting partner, rather than engaging in fitness-affecting interactions with existing sterility loci. In this case, seed sterility loci themselves will still appear to snowball with divergence between lineages; indeed, seed sterility loci have been shown to snowball between *Solanum* species [18].

525

While our conjecture regarding the saturation of different sterility phenotypes needs to be confirmed with further work, a more general implication of our results is that QTL mapping (or any count of individual hybrid incompatibility loci) might not always



provide a suitable estimate of the number and complexity of accumulating DMIs. Despite  
530 the considerable additional experimental burden this implies, future empirical tests of the  
snowball effect should aim to assess both the number of apparent incompatibility loci and  
evidence for non-independence among these loci. Moreover, we note that the high  
frequency of interactions with antagonistic effects on sterility also has implications for  
the pattern of accumulation of reproductive isolation phenotypes (rather than loci or  
535 DMIs) between these species. The amount of reproductive isolation is expected to  
snowball if DMIs are independent and have, on average, similar fitness effect sizes. If,  
however, antagonistic epistasis among sterility loci is common, the accumulation of  
reproductive isolation is expected to be less-than-linear, because new DMIs will tend to  
contribute ‘diminishing returns’ on fitness. This lack of a snowball specifically in  
540 incompatibility phenotypes has been previously noted [36, 37], and pervasive phenotypic  
antagonism could contribute to explaining this common observation [33].

Finally, in contrast to its phenotypic consequences, the mechanistic basis of pervasive  
genetic antagonism is unclear. This pattern of diminishing deleterious effects is consistent  
545 with observations in *E. coli* [38] and yeast [13], but the underlying basis is unresolved.  
For *Drosophila*, Yamamoto et al. [39] proposed that similar patterns of antagonism might  
be expected among loci that are involved in stabilizing selection within populations;  
however, this is unlikely to be relevant here both because our interacting loci are not  
normally segregating within populations, and because fertility traits are less likely to be  
550 subject to stabilizing selection at some intermediate phenotypic optimum (compared to  
other phenotypic traits). Alternatively, less-than-additive fitness effects can result when

different mutations each have deleterious individual effects within the same developmental pathway, but their pairwise combination suppresses or ameliorates these deleterious effects (as has been observed, for example, with double deletion strains in yeast; [13]). Our proposal that, in saturated systems, new substitutions are likely to interact with loci already involved in hybrid incompatibility, is consistent with sterility-affecting mutations accumulating in a tightly-connected network such as a specific developmental pathway. Of course, additional empirical work is needed to evaluate this possibility. Moreover, the frequency of antagonism and the potential for phenotypic diminishing returns are likely to be dependent on the properties of the diverging gene network. Further theoretical work is needed to determine how specific network properties, such as its connectivity and modularity, can affect the patterns of accumulation of incompatibilities and reproductive isolation.

## **Acknowledgements**

We thank Ata Kalirad and Ricardo Azevedo for helpful discussion, and our three reviewers for valuable comments. This work was supported by National Science Foundation awards DEB-0532097 and DEB-0841957 to LCM. C.D. Muir was supported by an NSF Graduate Research Fellowship. Research assistance was provided by T. Nakazato, E. B. Josephs, M. Yakub, E. Lines, and K. Wolt.

## Literature Cited

1. Coyne JA, Orr HA. Speciation. Sunderland, MA: Sinauer Associates, Inc; 2004.
2. Turelli M, Orr HA. Dominance, epistasis and the genetics of postzygotic isolation. *Genetics*. 2000;154(4):1663-79.
3. Orr HA, Turelli M. The evolution of postzygotic isolation: accumulating Dobzhansky-Muller incompatibilities. *Evolution*. 2001;55(6):1085-94.
4. Welch JJ. Accumulating Dobzhansky-Muller incompatibilities: reconciling theory and data. *Evolution*. 2004;58(6):1145-56.
5. Kondrashov AS. Accumulation of Dobzhansky-Muller incompatibilities within a spatially structured population. *Evolution*. 2003;57(1):151-3.
6. Turelli M, Barton NH, Coyne JA. Theory and speciation. *Trends in Ecology & Evolution*. 2001;16(7):330-43.
7. Cabot EL, Davis AW, Johnson NA, Wu CI. Genetics of reproductive isolation in the *Drosophila simulans* clade: complex epistasis underlying hybrid male sterility. *Genetics*. 1994;137(1):175-89.
8. Wu C-I, Johnson NA, Palopoli MF. Haldane's rule and its legacy: Why are there so many sterile males? *Trends in Ecology & Evolution*. 1996;11(7):281-4.
9. Kao C-H, Zeng Z-B, Teasdale RD. Multiple interval mapping for quantitative trait loci. *Genetics*. 1999;152(3):1203-16.
10. Doebley J, Stec A, Gustus C. teosinte branched1 and the origin of maize: evidence for epistasis and the evolution of dominance. *Genetics*. 1995;141(1):333-46.
11. Eshed Y, Zamir D. Less-than-additive epistatic interactions of quantitative trait loci in tomato. *Genetics*. 1996;143(4):1807-17.
12. Muir CD, Moyle LC. Antagonistic epistasis for ecophysiological trait differences between *Solanum* species. *New Phytologist*. 2009;183(3):789-802.
13. Jasnos L, Korona R. Epistatic buffering of fitness loss in yeast double deletion strains. *Nature genetics*. 2007;39(4):550-4.
14. He X, Qian W, Wang Z, Li Y, Zhang J. Prevalent positive epistasis in *Escherichia coli* and *Saccharomyces cerevisiae* metabolic networks. *Nature genetics*. 2010;42(3):272-6.
15. Moyle LC, Nakazato T. Complex epistasis for Dobzhansky–Muller hybrid incompatibility in *Solanum*. *Genetics*. 2009;181(1):347-51.
16. Monforte A, Friedman E, Zamir D, Tanksley S. Comparison of a set of allelic QTL-NILs for chromosome 4 of tomato: deductions about natural variation and implications for germplasm utilization. *Theoretical and Applied Genetics*. 2001;102(4):572-90.
17. Moyle LC, Graham EB. Genetics of hybrid incompatibility between *Lycopersicon esculentum* and *L. hirsutum*. *Genetics*. 2005;169(1):355-73.
18. Moyle LC, Nakazato T. Hybrid incompatibility “snowballs” between *Solanum* species. *Science*. 2010;329(5998):1521-3.
19. Moyle LC, Nakazato T. Comparative genetics of hybrid incompatibility: sterility in two *Solanum* species crosses. *Genetics*. 2008;179(3):1437-53.
20. Kearns CA, Inouye DW. Techniques for pollination biologists: University Press of Colorado; 1993.

21. R Core Team. A language and environment for statistical computing. Vienna, Austria: R Foundation for Statistical Computing; 2016.
22. Schwarz G. Estimating the dimension of a model. *The annals of statistics*. 1978;6(2):461-4.
23. Csardi G, Nepusz T. The igraph software package for complex network research. *InterJournal, Complex Systems*. 2006;1695(5):1-9.
24. Pedersen TL. ggraph: An implementation of grammar of graphics for graphs and networks. R package version 0.1.1 ed2016.
25. Gao H, Granka JM, Feldman MW. On the classification of epistatic interactions. *Genetics*. 2010;184(3):827-37.
26. Mani R, Onge RPS, Hartman JL, Giaever G, Roth FP. Defining genetic interaction. *Proceedings of the National Academy of Sciences*. 2008;105(9):3461-6.
27. Chang AS, Noor MA. The genetics of hybrid male sterility between the allopatric species pair *Drosophila persimilis* and *D. pseudoobscura bogotana*: dominant sterility alleles in collinear autosomal regions. *Genetics*. 2007;176(1):343-9.
28. Willett CS. Complex deleterious interactions associated with malic enzyme may contribute to reproductive isolation in the copepod *Tigriopus californicus*. *PLoS One*. 2011;6(6):e21177.
29. Kelly JK, Mojica JP. Interactions among flower-size QTL of *Mimulus guttatus* are abundant but highly variable in nature. *Genetics*. 2011;189(4):1461-71.
30. Orr HA. The population genetics of speciation: the evolution of hybrid incompatibilities. *Genetics*. 1995;139(4):1805-13.
31. Gavrillets S. Rapid evolution of reproductive barriers driven by sexual conflict. *Nature*. 2000;403(6772):886-9.
32. Rice WR, Holland B. The enemies within: intergenomic conflict, interlocus contest evolution (ICE), and the intraspecific Red Queen. *Behavioral Ecology and Sociobiology*. 1997;41(1):1-10.
33. Kalirad A, Azevedo RB. Spiraling complexity: a test of the snowball effect in a computational model of RNA folding. *Genetics*. 2017;116.196030.
34. Arnqvist G, Rowe L. Sexual conflict: Princeton University Press; 2013.
35. Holland B, Rice WR. Perspective: chase-away sexual selection: antagonistic seduction versus resistance. *Evolution*. 1998:1-7.
36. Gourbiere S, Mallet J. Are species real? The shape of the species boundary with exponential failure, reinforcement, and the “missing snowball”. *Evolution*. 2010;64(1):1-24.
37. Johnson N. Patterns and processes of speciation: the evolution of reproductive isolating barriers. In: Fox CW, Wolf JB, editors. *Evolutionary genetics concepts and case studies* New York, NY, USA: Oxford University Press; 2006. p. 374-86.
38. Wiser MJ, Ribeck N, Lenski RE. Long-term dynamics of adaptation in asexual populations. *Science*. 2013;342(6164):1364-7.
39. Yamamoto A, Anholt RR, Mackay TF. Epistatic interactions attenuate mutations affecting startle behaviour in *Drosophila melanogaster*. *Genetics research*. 2009;91(06):373-82.

**Table 1:** Introgression lines (ILs) phenotyped and used as parents to generate double-introgression lines. Accession identifiers from the Tomato Genome Resource Center (tgrc.ucdavis.edu). QTL: Prior evidence of IL carrying QTL for pollen sterility (P), seed sterility (S) or none (N). Chr: Chromosomal location of the introgression (out of 12 chromosomes in the *lyc* genome). Size: length of introgressed region, as a percentage of the *lyc* genome. Seed: Sample size (N), mean (and standard deviation) for self-seed count (SSC) and pollen-corrected seed fertility (SF). Pollen: Sample size (N), mean (and standard deviation) for proportion of fertile pollen (PF). *P*-values are from normal and quasi-likelihood binomial general linear models (for seed and pollen, respectively). (\*) The IL has a significant individual effect on the corresponding phenotype.

| Accession | QTL | Chr | Size | Seed |           |            |          | Pollen |             |          |
|-----------|-----|-----|------|------|-----------|------------|----------|--------|-------------|----------|
|           |     |     |      | N    | SSC       | SF         | <i>P</i> | N      | PF          | <i>P</i> |
| LA3947    | N   | 6   | 0.68 | 6    | 48.1 (15) | 14.2 (2.4) | 0.3      | 4      | 0.72 (0.27) | 0.005    |
| LA3957    | N   | 9   | 3.6  | 6    | 26.8 (17) | 9.7 (3.4)  | 0.08     | 6      | 0.72 (0.30) | 0.005    |
| LA3964    | N   | 10  | 1.8  | 6    | 44.7 (21) | 13.2 (4.1) | 0.7      | 5      | 0.77 (0.28) | 0.03     |
| LA3968    | N   | 12  | 1.1  | 6    | 34.5 (16) | 11.4 (4.1) | 0.5      | 5      | 0.71 (0.16) | 3e-04    |
| LA3975    | N   | 3   | 0.96 | 6    | 44.2 (25) | 13 (4.3)   | 0.7      | 5      | 0.79 (0.19) | 0.02     |
| LA3935    | P   | 4   | 4.2  | 6    | 15.1 (13) | 6.96 (4.1) | 0.001*   | 6      | 0.57 (0.29) | 5e-06*   |
| LA3948    | P   | 7   | 4    | 6    | 56.2 (16) | 16.3 (2.9) | 0.02     | 6      | 0.55 (0.33) | 7e-06*   |
| LA3950    | P   | 7   | 2.7  | 6    | 13.2 (10) | 6.61 (3.2) | 5e-04*   | 5      | 0.58 (0.07) | 1e-07*   |
| LA3956    | P   | 9   | 4.6  | 6    | 18.3 (12) | 7.82 (2.9) | 0.004*   | 6      | 0.72 (0.11) | 1e-04*   |
| LA3963    | P   | 10  | 2.4  | 4    | 27.6 (20) | 11.3 (4)   | 0.5      | 5      | 0.29 (0.2)  | 3e-10*   |
| LA3915    | S   | 1   | 2.8  | 6    | 30.6 (9)  | 11.2 (2.0) | 0.4      | 5      | 0.56 (0.24) | 2e-06*   |
| LA3931    | S   | 4   | 1.5  | 6    | 22.1 (13) | 8.6 (3.5)  | 0.02     | 5      | 0.75 (0.12) | 0.002    |
| LA3939    | S   | 5   | 2    | 6    | 26.5 (13) | 9.61 (2.7) | 0.06     | 6      | 0.78 (0.17) | 0.01     |
| LA3943    | S   | 5   | 2.7  | 6    | 17.6 (13) | 7.29 (4.5) | 0.003*   | 3      | 0.67 (0.25) | 7e-04    |
| LA3977    | S   | 4   | 1.5  | 5    | 15.4 (13) | 7.74 (4.5) | 0.009    | 3      | 0.40 (0.40) | 2e-06*   |
| LA4024    | -   | -   | -    | 31   | 42.1 (16) | 12.4 (3.2) | -        | 32     | 0.90 (0.07) | -        |

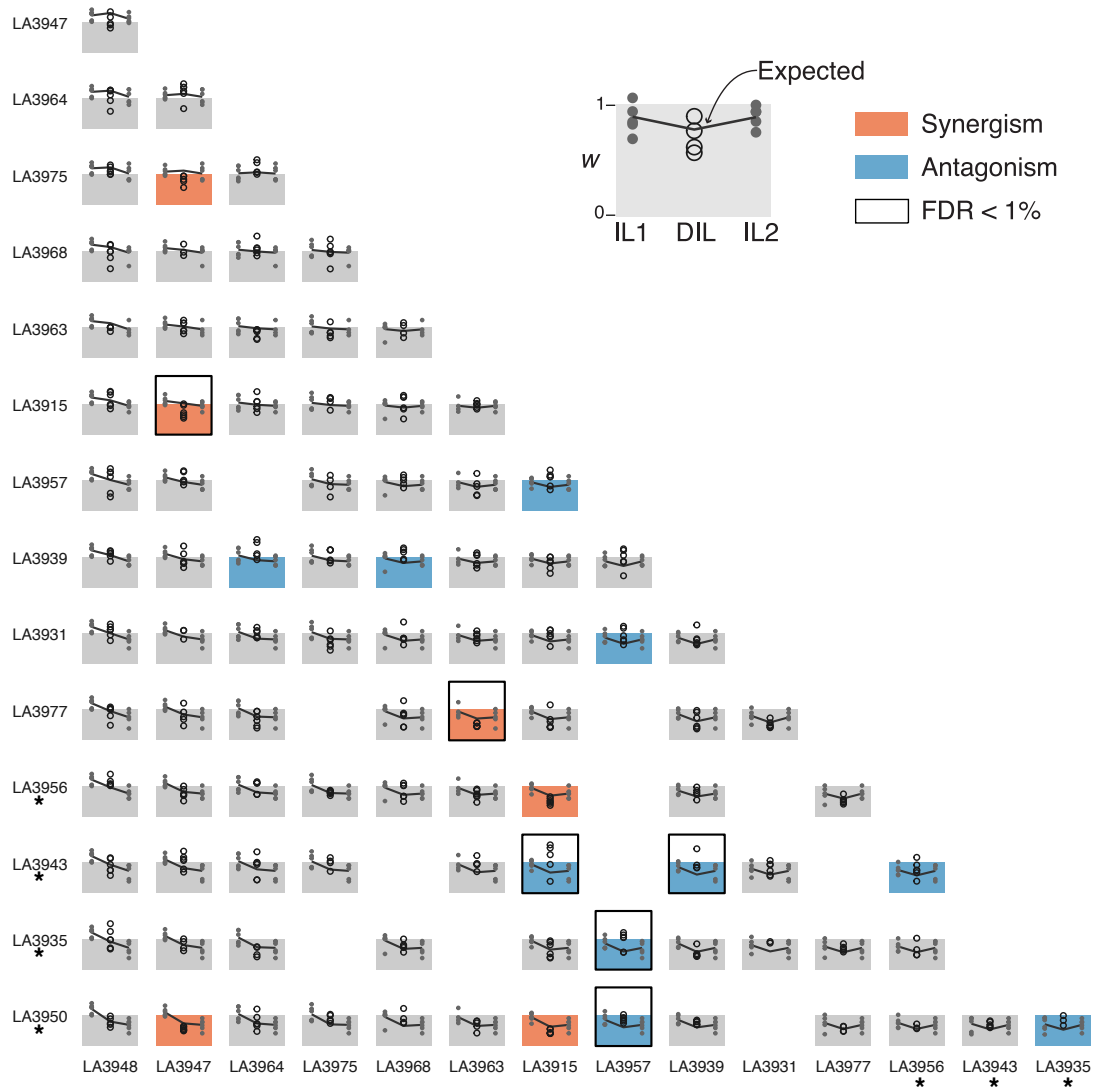

**Figure 1:** Self-seed set, relative to *S. lycopersicum*, for all parental introgression lines (ILs) and double-introgression lines (DILs). Parental ILs (across rows and columns) are arranged by their individual effect on the phenotype (larger effects down and to the right). Parental ILs with significant individual fitness effects are marked with an asterisk. Each panel shows the observed values for two parents (small circles) and their corresponding DIL (large circles, center in each panel). Lines connect the observed mean phenotypes for each parental IL and the expected mean phenotype for the DIL. The background of each panel spans from 0 to 1 along the vertical axis (1 corresponds to the mean fitness value of *S. lycopersicum*). Accented panels show significant support ( $P < 0.01$ ) for epistasis (antagonistic interactions = blue panels; synergistic = red panels). Black bordered panels indicate highly significant interactions (FDR 1%).

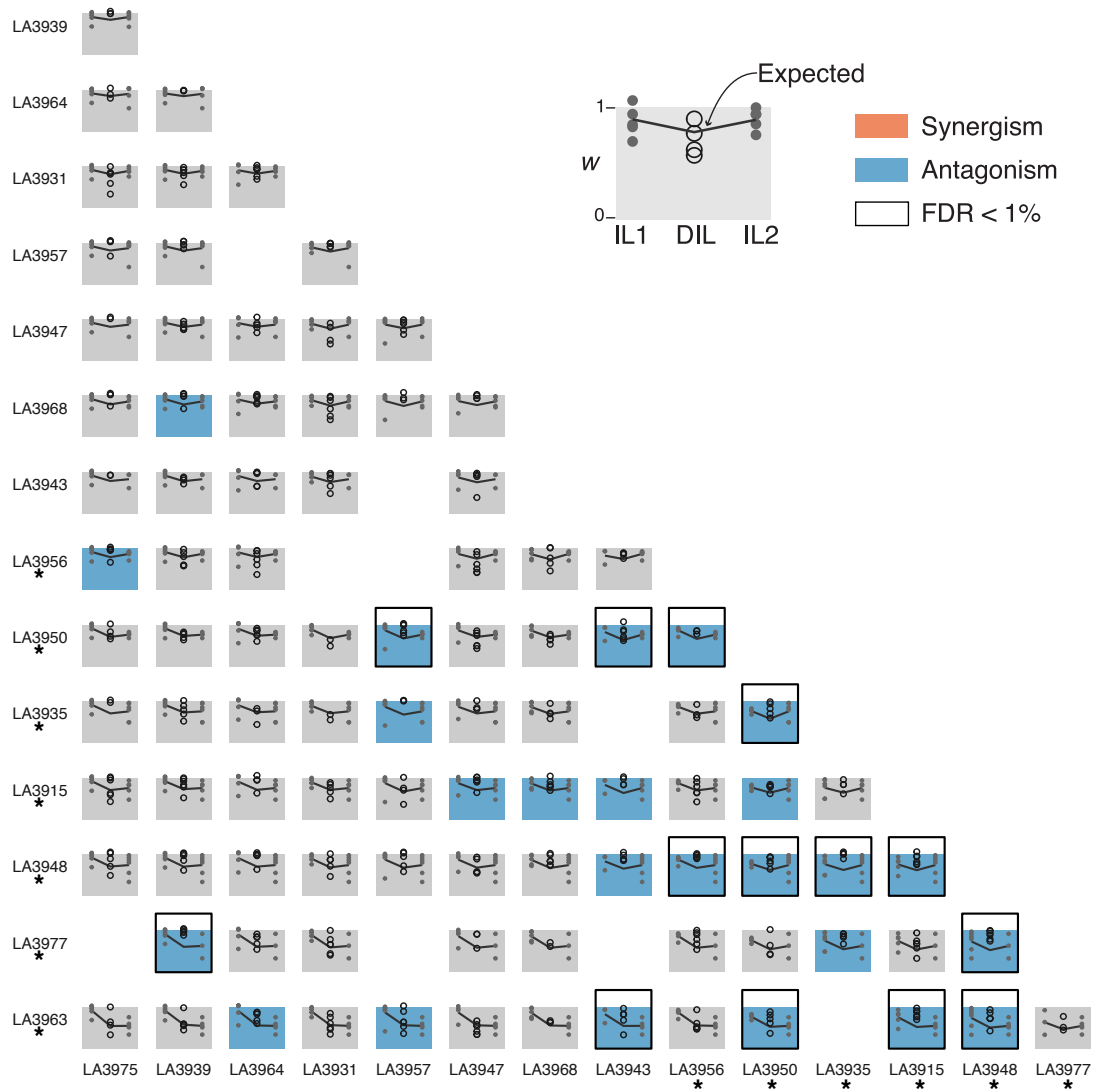

**Figure 2:** Proportion of fertile pollen, relative to *S. lycopersicum*, for all parental introgression lines (ILs) and double-introgression lines (DILs). All conventions as in Figure 2.



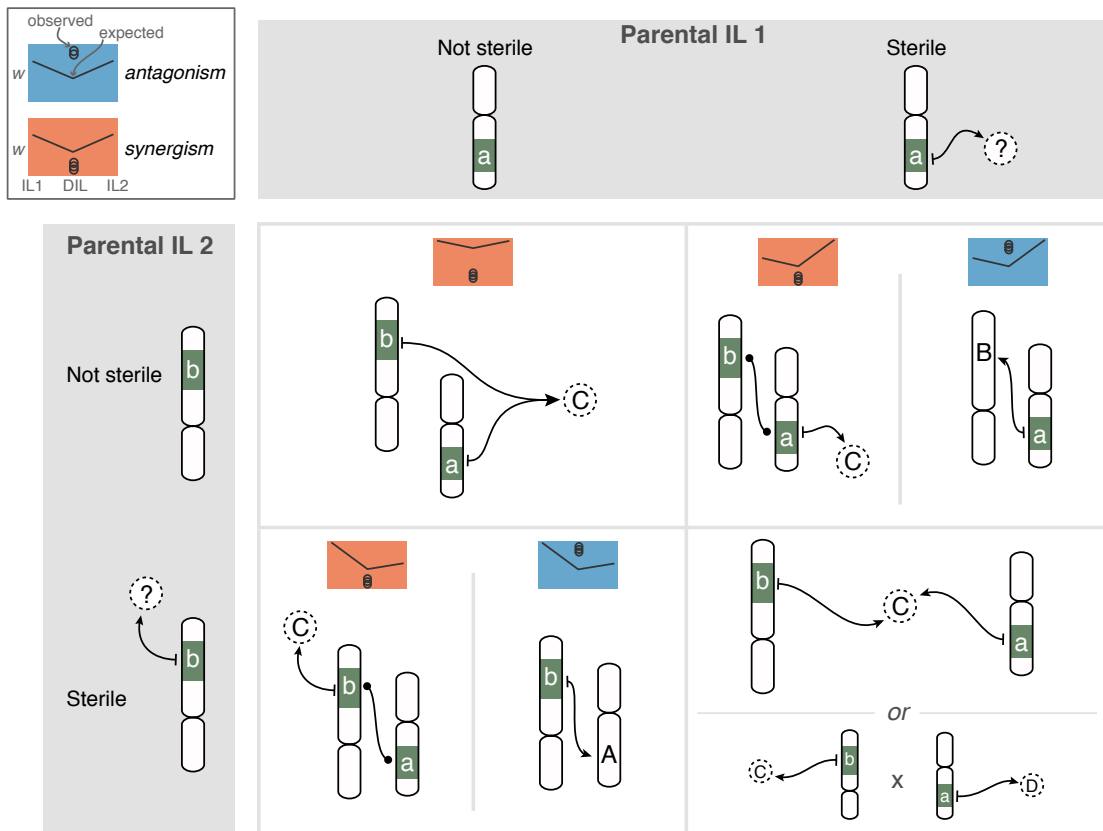

**Figure 3.** Possible DMI architecture inferred from observed epistasis in DILs. Synergistic epistasis (orange boxes), regardless of fitness of the parents, implies a higher-order DMI that involves *hab* alleles in both introgressions (a, b; green background) and at least one *lyc* locus at an unknown genomic location (C, dashed circles). Antagonistic interactions (blue boxes) between sterile and non-sterile ILs indicate a pairwise DMI (either a,B in the upper right or A,b in the lower left). Interactions, in any direction, between two sterile ILs suggests a higher-order DMI or complex epistasis between two DMIs (lower right panels).



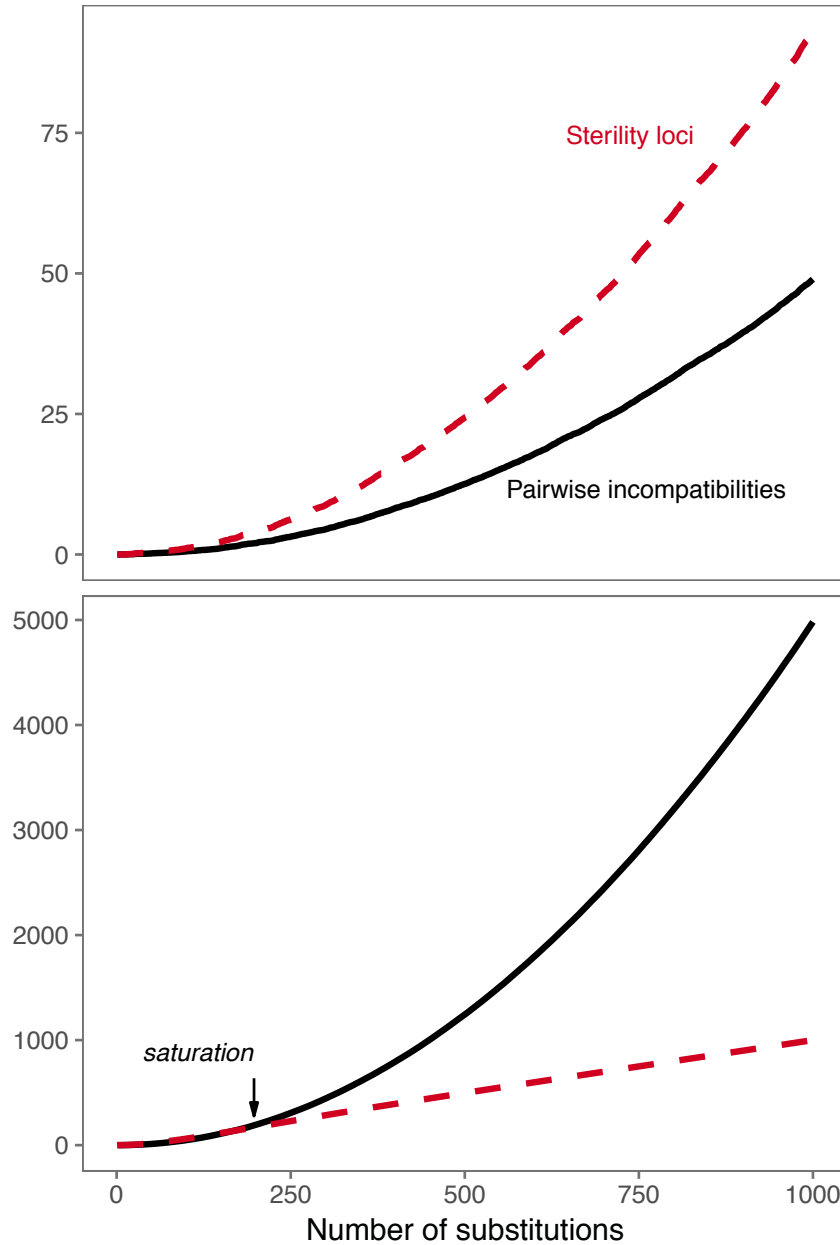

**Figure 5:** The number of pairwise incompatibilities (showing the “snowball” effect, solid lines), and the number of loci involved in hybrid incompatibilities (red dashed lines), for two cases that differ in the per-substitution probability of pairwise incompatibility (above,  $p = 0.0001$ ; below,  $p = 0.01$ ). Above: In systems that have not saturated, the number of incompatibilities and the number sterility loci grow at a similar rate. While the number of sterility loci is roughly twice the number of incompatibilities, both quantities grow at a faster-than-linear rate. Below: After saturation (around 200 substitutions), the number of loci involved in incompatibilities increases linearly, no longer tracking the number of DMIs. Values are the mean of 100 simulations for each case.

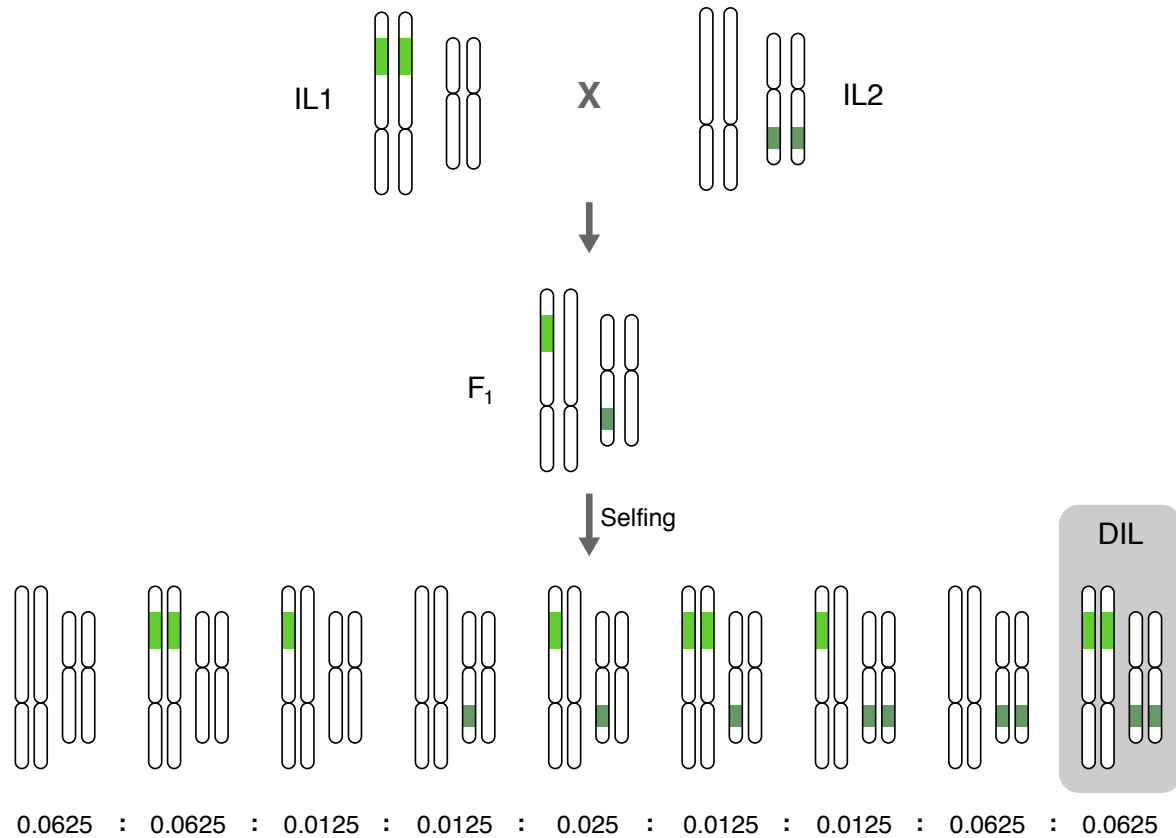

**Figure S1:** Diagram of cross made to generate the double-introgression lines (DILs). Green shaded areas within a chromosome represent introgressed *hab* regions in an isogenic *lyc* background. Included are the expected genotypic ratios in an F2 population for each DIL family, if marker transmission is Mendelian.

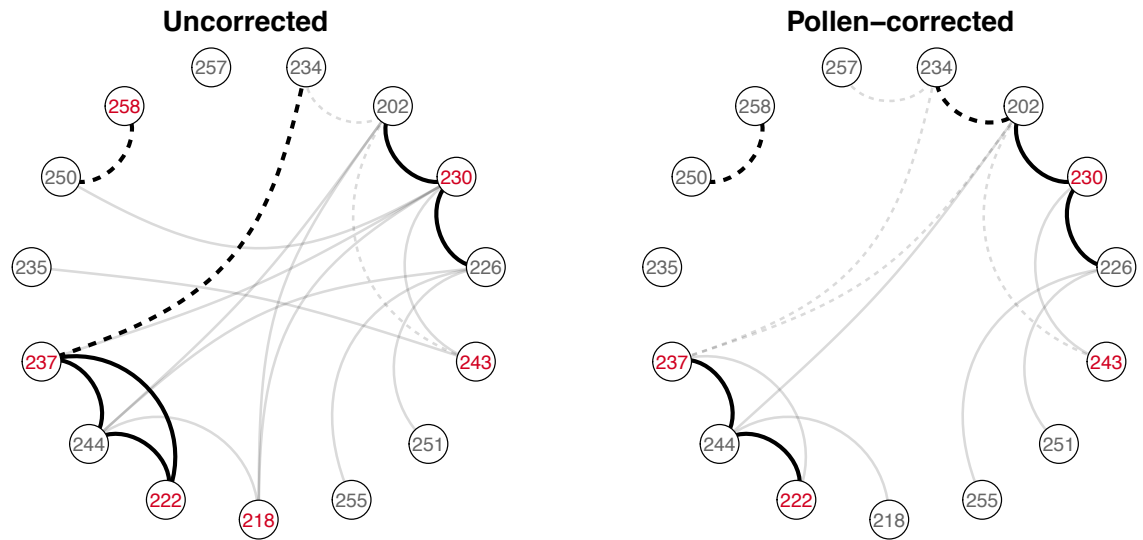

**Figure S2.** Network representation of interactions in uncorrected self-seed set (left) and pollen-corrected seed (right). Parental ILs (nodes; red label= sterile IL) are connected if they showed a highly significant interaction (FDR=1%). Solid lines denote antagonistic interactions; dashed lines mean synergistic interactions.



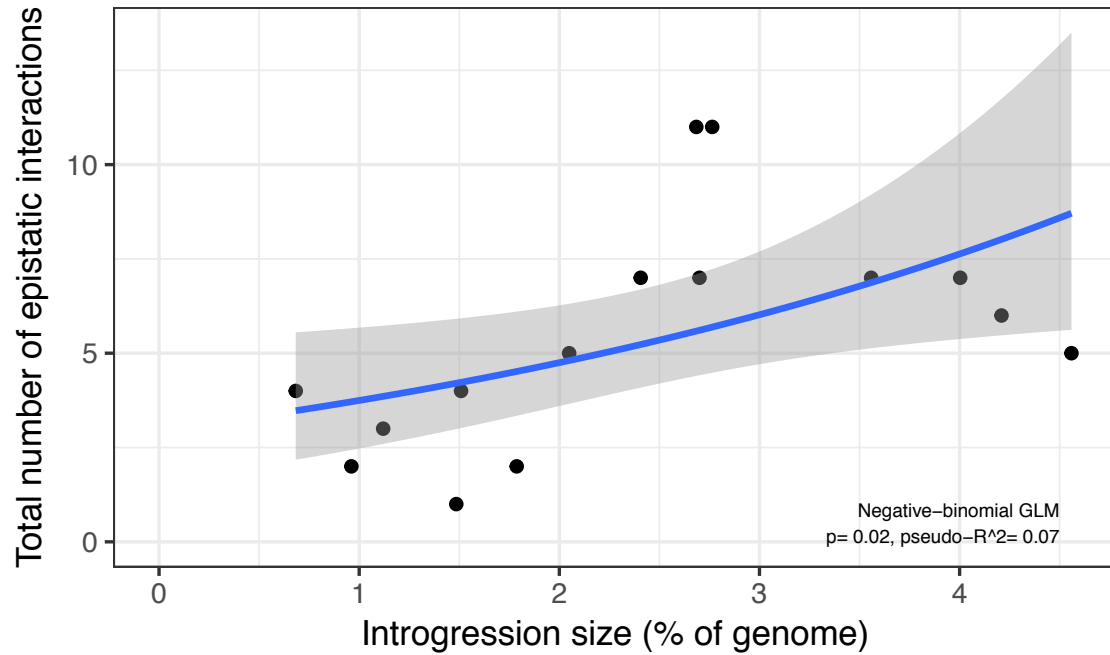

**Figure S4.** Relationship between the total number of interactions observed for an introgression and its estimated size (as a percent of the *lyc* genome). The total number of interactions is the sum of highly significant (FDR 1%) interactions observed in pollen and seed fertility.
